# Supplementary material
Source: publisher figshare collection journal article supplement (https://sage.figshare.com/ndownloader/files/20333439)
Supplement: Supplementary file 1 [file 20333439]

**Supplementary figure S5. Switch-related AEs by SOC**

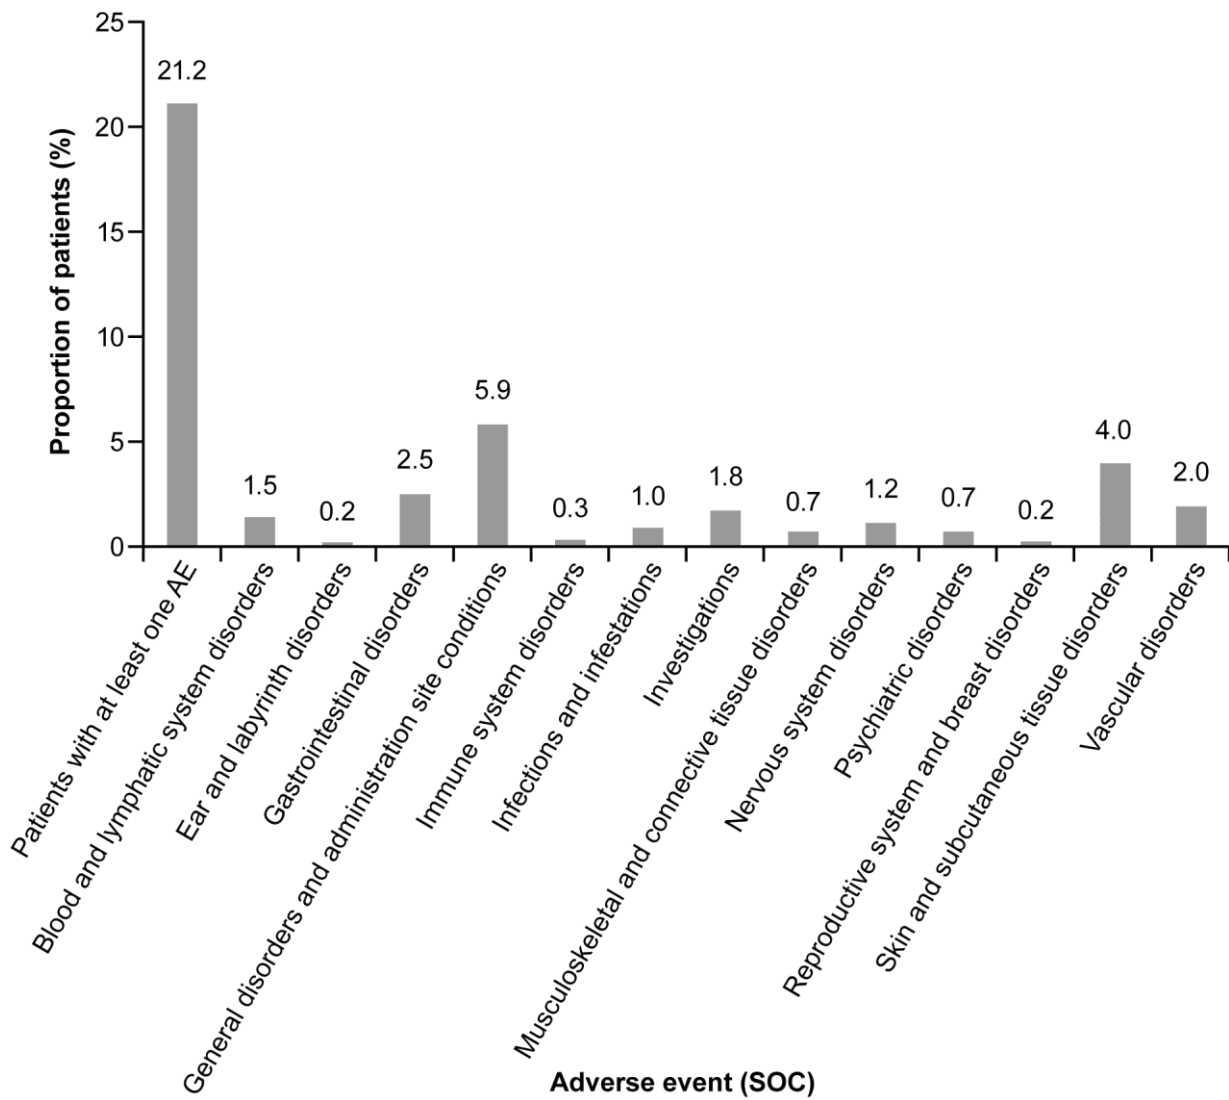

Data were recorded retrospectively using medical charts. AEs were coded using MedDRA 19.0. One AE (acute episode of multiple sclerosis) is recorded here, however was not indicated as a reason to switch (only failure of previous therapy was indicated as reason to switch).

AE, adverse event; MedDRA, Medical Dictionary for Regulatory Activities; SOC, System Organ Class.
